# Supplementary material
Source: PubMed Central journal article supplement (PMC8211907)
Supplement: NIHMS1656160-supplement-fig_S1.pdf [file NIHMS1656160-supplement-fig_S1.pdf]

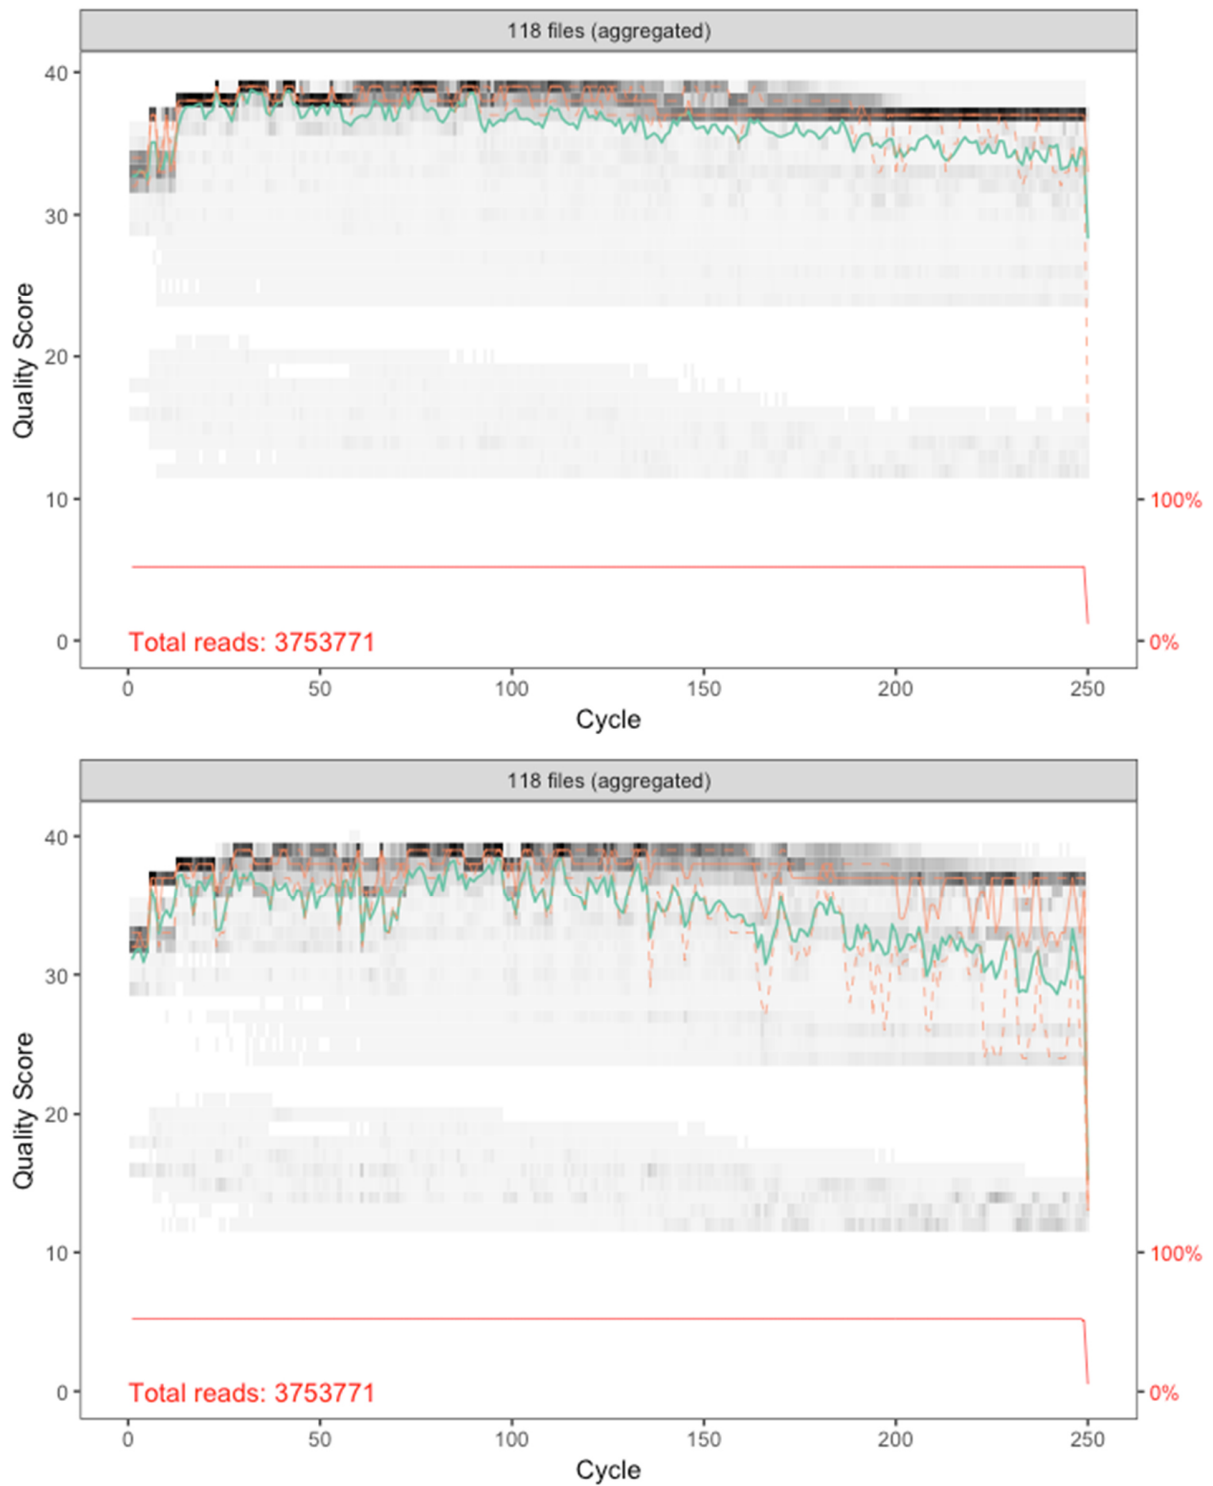

**Figure S1.** Quality scores of the aggregated forward (top panel) and reverse (bottom panel) 16S rRNA amplicon sequence reads. Summarized quality scores at each sequence position are indicated by the green line (mean score), the solid orange line (median score), and the dotted orange lines (upper and lower quartile scores).
