# Supplementary material
Source: PubMed Central journal article supplement (PMC8211907)
Supplement: NIHMS1656160-supplement-fig_S2.pdf [file NIHMS1656160-supplement-fig_S2.pdf]

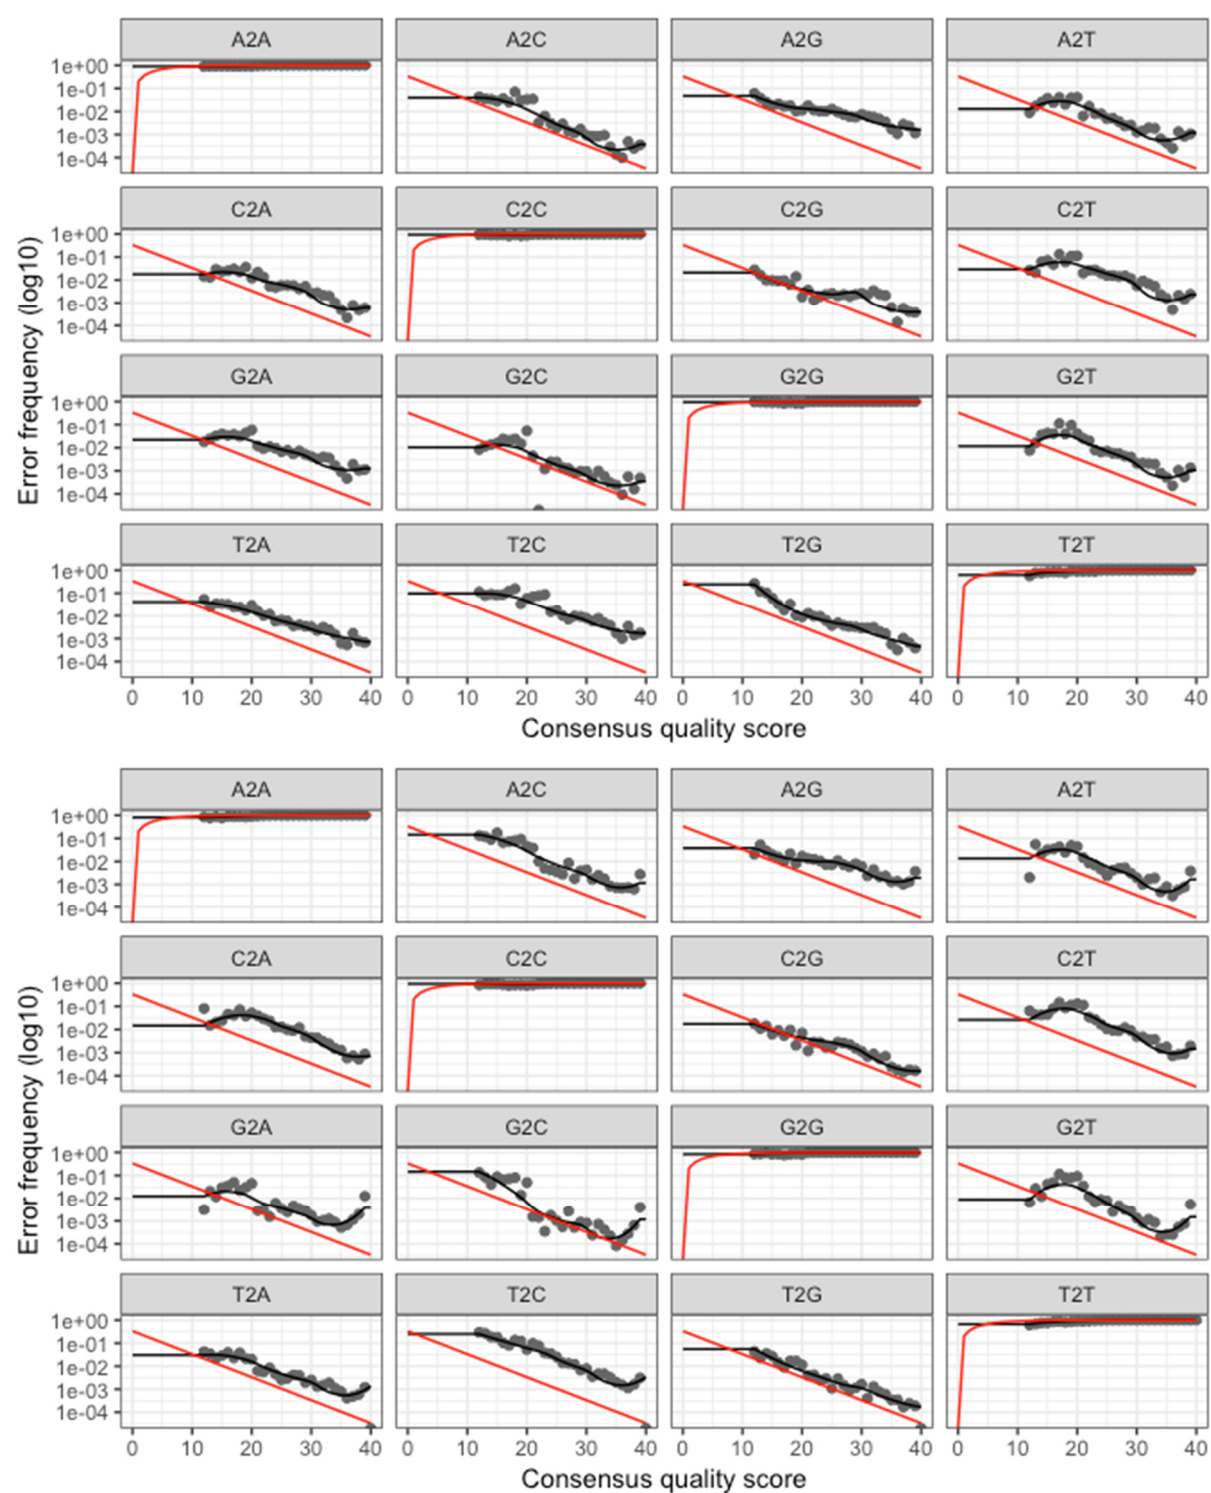

**Figure S2.** Dada2 error models used for the forward (top panel) and reverse (bottom panel) 16S rRNA amplicon sequence reads.
