# Supplementary material
Source: PubMed Central journal article supplement (PMC8211907)
Supplement: NIHMS1656160-supplement-Fig_S4.pdf [file NIHMS1656160-supplement-Fig_S4.pdf]

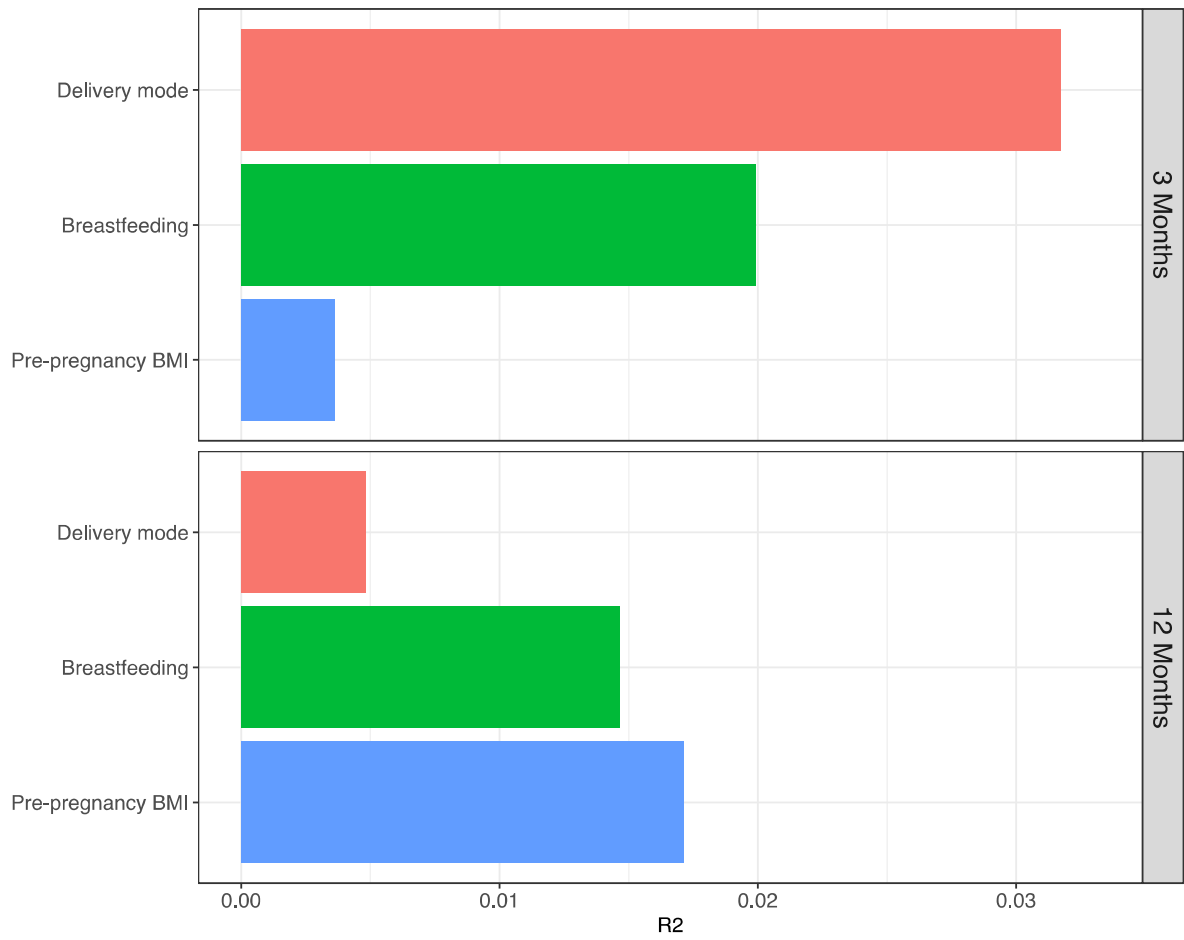

**Figure S4.** Proportion of the variance ( $R^2$ ) in the infant gut microbial community structure (Weighted UniFrac) that is explained by delivery mode, breastfeeding and pre-pregnancy BMI at 3 months (top panel) and 12 months (bottom panel).
