# Supplementary material
Source: PubMed Central journal article supplement (PMC8211907)
Supplement: NIHMS1656160-supplement-Fig_S5.pdf [file NIHMS1656160-supplement-Fig_S5.pdf]

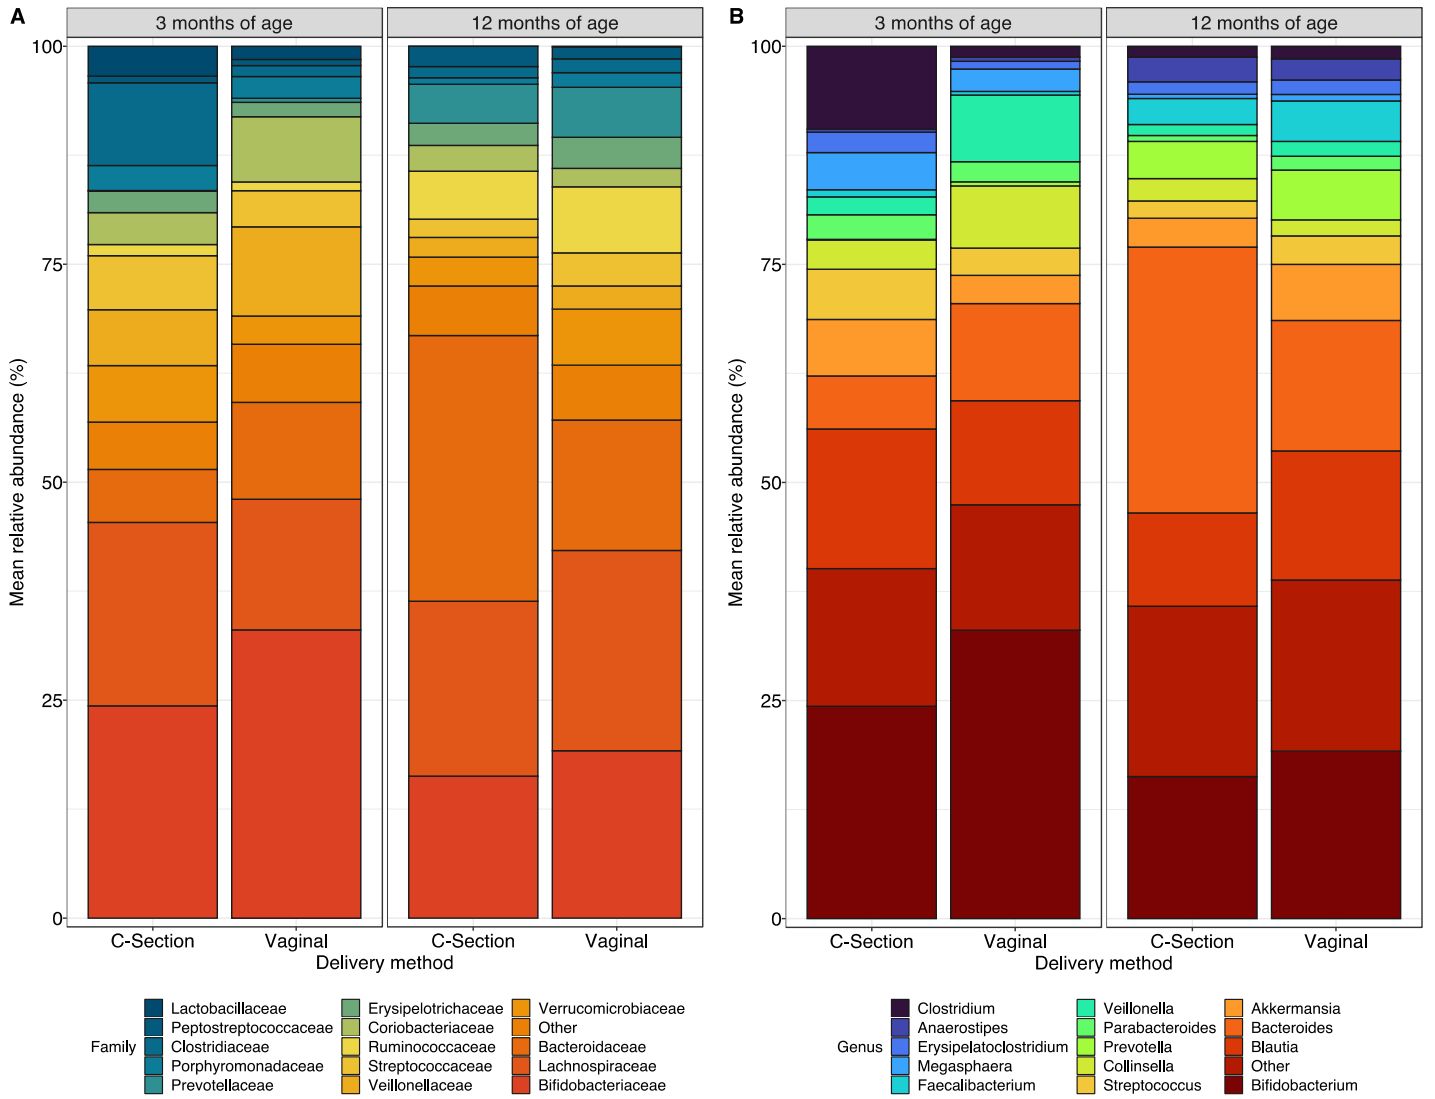

**Figure S5.** Mean relative abundance (%) of (A) top 14 bacterial families and (B) top 14 bacterial genera, stratified by delivery mode and time of follow up. Remaining taxa were grouped with other.
