# Supplementary material
Source: PubMed Central journal article supplement (PMC8211907)
Supplement: NIHMS1656160-supplement-Fig_S6.pdf [file NIHMS1656160-supplement-Fig_S6.pdf]

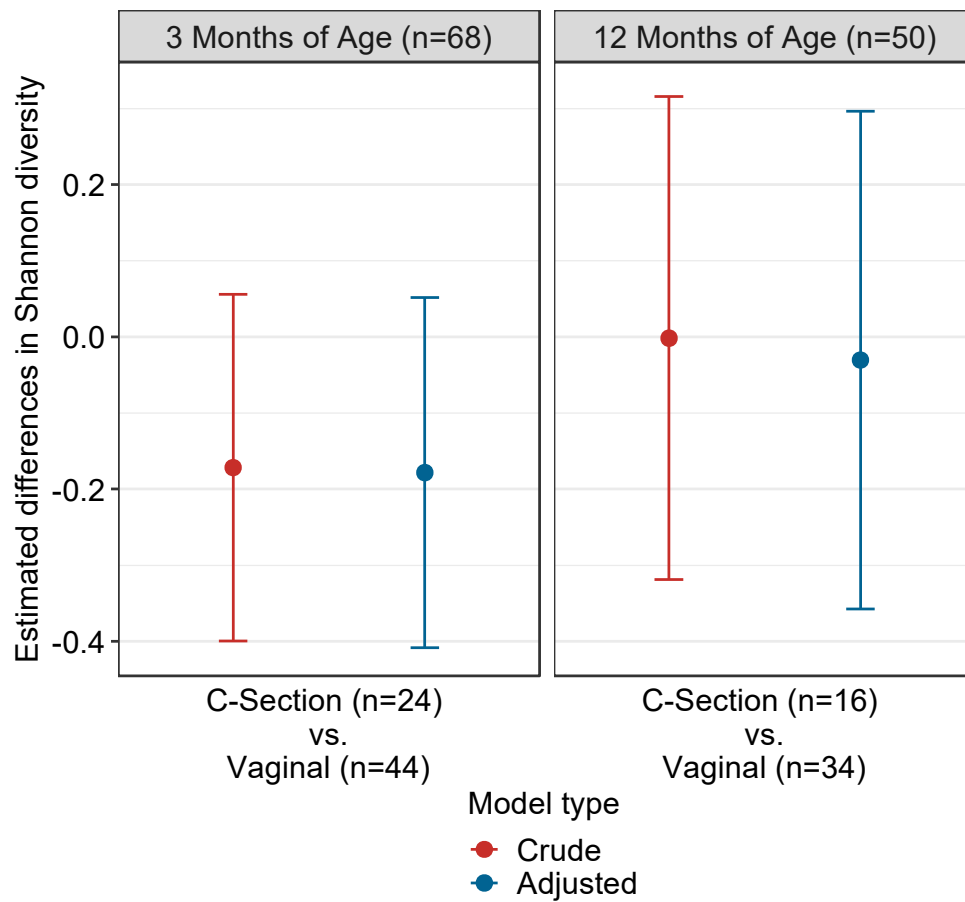

**Figure S6.** Differences between C-section-born infants and vaginal-born infants (reference) in the gut microbiome Shannon diversity index at 3 months of age and 12 months of age, before (crude) and after adjustment for maternal pre-pregnancy body mass index and breastfeeding.
