# Supplementary material
Source: PubMed Central journal article supplement (PMC8211907)
Supplement: NIHMS1656160-supplement-Fig_S7.pdf [file NIHMS1656160-supplement-Fig_S7.pdf]

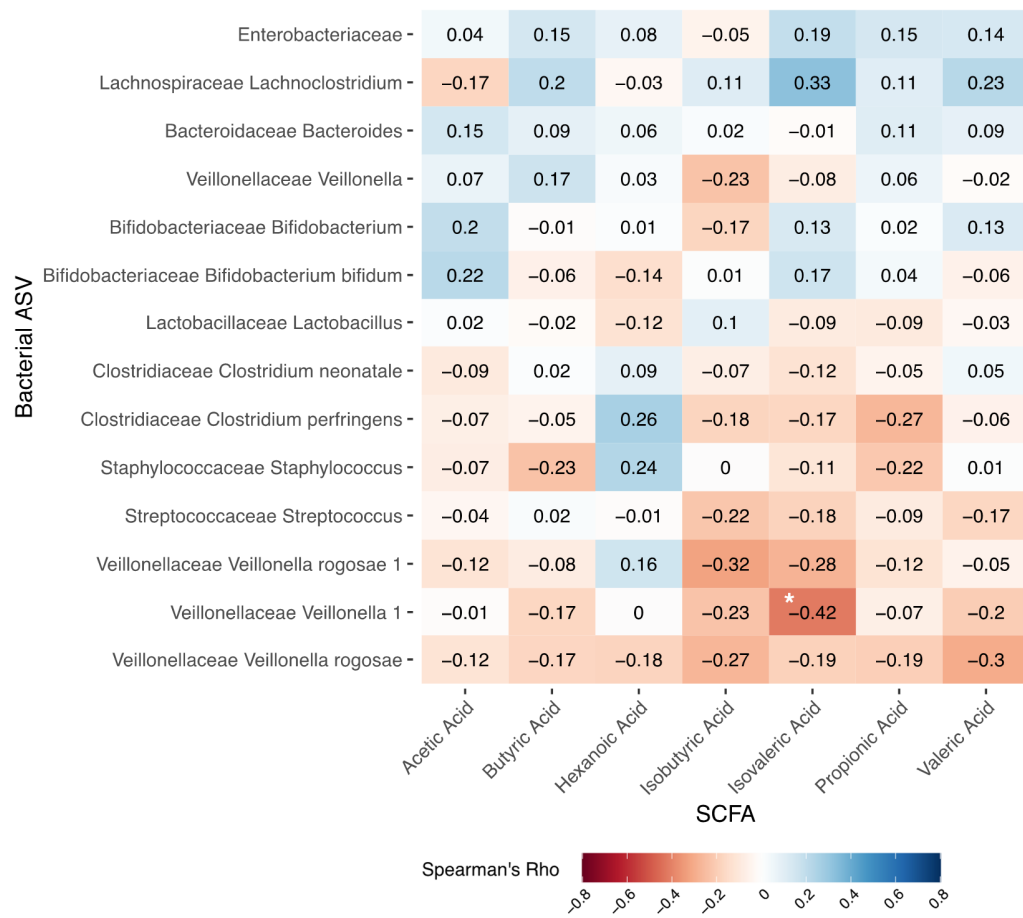

**Figure S7.** Spearman correlations of delivery-mode associated ASVs with fecal SCFA concentrations at 3 months of age. A white asterisk indicates an FDR-corrected p-value < 0.05.
