# Supplementary material
Source: PubMed Central journal article supplement (PMC8211907)
Supplement: NIHMS1656160-supplement-Fig_S9.pdf [file NIHMS1656160-supplement-Fig_S9.pdf]

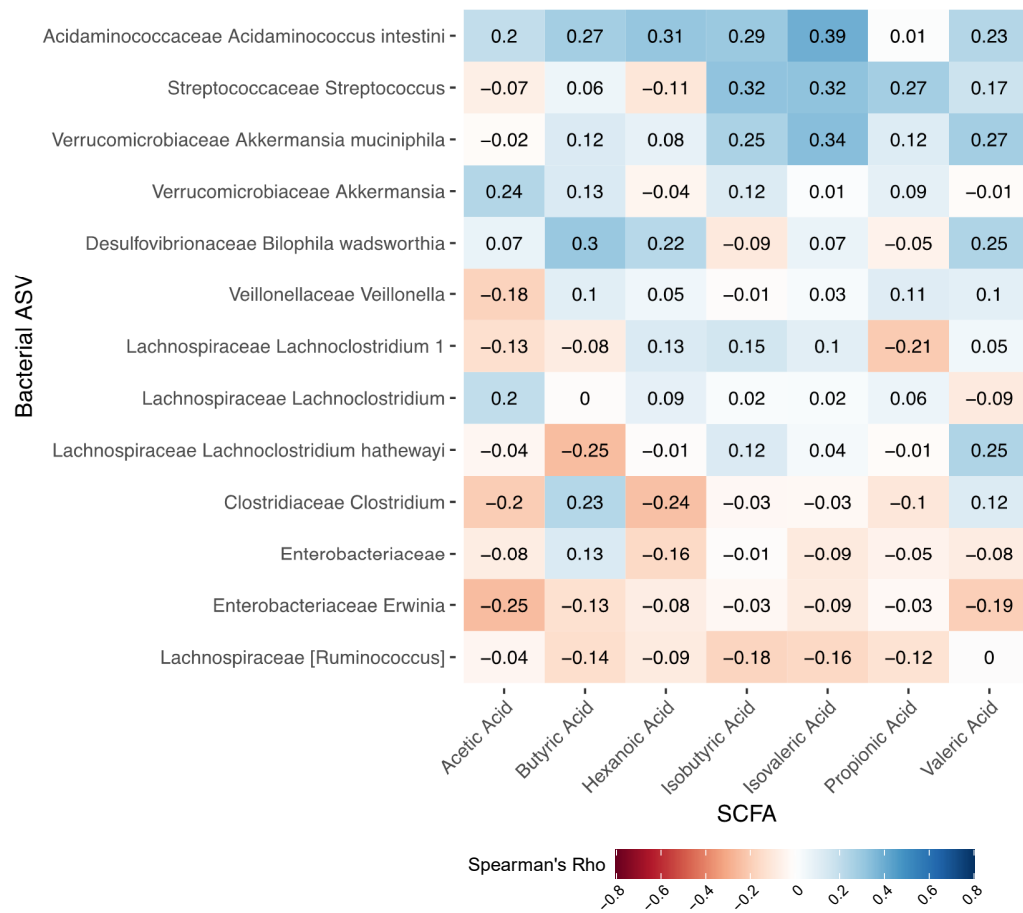

**Figure S9.** Spearman correlations of delivery-mode associated ASVs with fecal SCFA concentrations at 12 months of age.
