# Supplementary material
Source: PubMed Central journal article supplement (PMC8211907)
Supplement: NIHMS1656160-supplement-Fig_S10.pdf [file NIHMS1656160-supplement-Fig_S10.pdf]

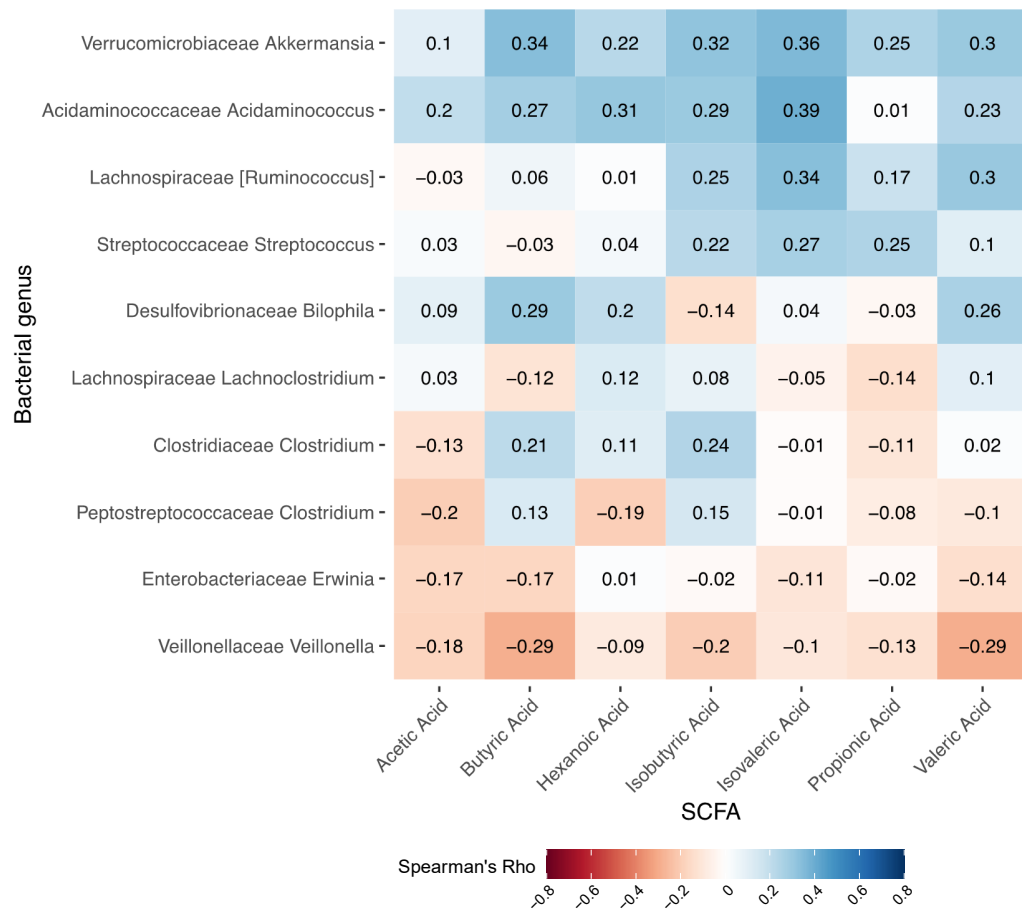

**Figure S10.** Spearman correlations of delivery-mode associated genera with fecal SCFA concentrations at 12 months of age.
