# Supplementary material
Source: PubMed Central journal article supplement (PMC8211907)
Supplement: NIHMS1656160-supplement-Table_S1.pdf [file NIHMS1656160-supplement-Table_S1.pdf]

**Table S1.** Differences in the logit-transformed relative abundances of bacterial ASVs associated with delivery mode at 3 months of age, after adjustment for maternal pre-pregnancy BMI and breastfeeding in beta-binomial models. Unadjusted Mann-Whitney U test p-values provided in rightmost column.

| Beta  | SE   | FDR p-value | Phylum         | Class               | Order             | Family             | Genus             | Species     | Mann-Whitney U p-value |
|-------|------|-------------|----------------|---------------------|-------------------|--------------------|-------------------|-------------|------------------------|
| 3.52  | 0.94 | 0.001       | Firmicutes     | Bacilli             | Lactobacillales   | Streptococcaceae   | Streptococcus     | NA          | 0.27                   |
| 2.72  | 1.02 | 0.028       | Firmicutes     | Clostridia          | Clostridiales     | Clostridiaceae     | Clostridium       | perfringens | 0.04                   |
| 2.66  | 1.04 | 0.036       | Firmicutes     | Bacilli             | Lactobacillales   | Lactobacillaceae   | Lactobacillus     | NA          | 0.67                   |
| 2.41  | 0.75 | 0.008       | Firmicutes     | Clostridia          | Clostridiales     | Clostridiaceae     | Clostridium       | neonatale   | 0.06                   |
| 2.35  | 0.95 | 0.046       | Firmicutes     | Clostridia          | Clostridiales     | Lachnospiraceae    | Lachnoclostridium | NA          | 0.04                   |
| 1.76  | 0.59 | 0.013       | Proteobacteria | Gammaproteobacteria | Enterobacteriales | Enterobacteriaceae | NA                | NA          | 0.95                   |
| -1.34 | 0.49 | 0.025       | Actinobacteria | Actinobacteria      | Bifidobacteriales | Bifidobacteriaceae | Bifidobacterium   | bifidum     | 0.08                   |
| -1.64 | 0.59 | 0.021       | Actinobacteria | Actinobacteria      | Bifidobacteriales | Bifidobacteriaceae | Bifidobacterium   | NA          | 0.006                  |
| -2.00 | 0.73 | 0.024       | Firmicutes     | Negativicutes       | Selenomonadales   | Veillonellaceae    | Veillonella       | rogosae     | 0.96                   |
| -2.08 | 0.62 | 0.005       | Firmicutes     | Negativicutes       | Selenomonadales   | Veillonellaceae    | Veillonella       | NA          | 0.21                   |
| -2.09 | 0.7  | 0.013       | Firmicutes     | Negativicutes       | Selenomonadales   | Veillonellaceae    | Veillonella       | rogosae     | 0.28                   |
| -2.85 | 0.51 | <0.001      | Firmicutes     | Bacilli             | Bacillales        | Staphylococcaceae  | Staphylococcus    | NA          | 0.99                   |
| -3.09 | 1.18 | 0.032       | Firmicutes     | Negativicutes       | Selenomonadales   | Veillonellaceae    | Veillonella       | NA          | 0.34                   |
| -5.07 | 1.07 | <0.001      | Bacteroidetes  | Bacteroidia         | Bacteroidales     | Bacteroidaceae     | Bacteroides       | NA          | 0.42                   |
