# Supplementary material
Source: PubMed Central journal article supplement (PMC8211907)
Supplement: NIHMS1656160-supplement-Table_S2.pdf [file NIHMS1656160-supplement-Table_S2.pdf]

**Table S2.** Differences in the logit-transformed relative abundances of bacterial ASVs associated with delivery mode at 12 months of age, after adjustment for maternal pre-pregnancy BMI and breastfeeding in beta-binomial models. Unadjusted Mann-Whitney U test p-values provided in rightmost column.

| Beta  | SE   | FDR p-value | Phylum          | Class               | Order              | Family              | Genus             | Species     | Mann-Whitney U p-value |
|-------|------|-------------|-----------------|---------------------|--------------------|---------------------|-------------------|-------------|------------------------|
| 3.46  | 0.79 | <0.001      | Verrucomicrobia | Verrucomicrobiae    | Verrucomicrobiales | Verrucomicrobiaceae | Akkermansia       | muciniphila | 0.72                   |
| 2.87  | 1.09 | 0.036       | Firmicutes      | Clostridia          | Clostridiales      | Clostridiaceae      | Clostridium       | NA          | 0.96                   |
| 2.81  | 0.88 | 0.01        | Proteobacteria  | Gammaproteobacteria | Enterobacteriales  | Enterobacteriaceae  | NA                | NA          | 0.73                   |
| 2.60  | 0.94 | 0.026       | Proteobacteria  | Gammaproteobacteria | Enterobacteriales  | Enterobacteriaceae  | Erwinia           | NA          | 0.74                   |
| -1.05 | 0.38 | 0.024       | Firmicutes      | Bacilli             | Lactobacillales    | Streptococcaceae    | Streptococcus     | NA          | 0.18                   |
| -1.66 | 0.59 | 0.025       | Firmicutes      | Clostridia          | Clostridiales      | Lachnospiraceae     | Lachnoclostridium | hathewayi   | 0.87                   |
| -1.76 | 0.67 | 0.038       | Firmicutes      | Clostridia          | Clostridiales      | Lachnospiraceae     | Lachnoclostridium | NA          | 0.49                   |
| -2.86 | 0.93 | 0.013       | Firmicutes      | Clostridia          | Clostridiales      | Lachnospiraceae     | [Ruminococcus]    | NA          | 0.93                   |
| -3.08 | 0.94 | 0.008       | Firmicutes      | Clostridia          | Clostridiales      | Lachnospiraceae     | Lachnoclostridium | NA          | 0.04                   |
| -3.34 | 1.21 | 0.027       | Proteobacteria  | Deltaproteobacteria | Desulfovibrionales | Desulfovibrionaceae | Bilophila         | wadsworthia | 0.69                   |
| -3.42 | 1.04 | 0.007       | Firmicutes      | Negativicutes       | Selenomonadales    | Veillonellaceae     | Veillonella       | NA          | 0.71                   |
| -4.66 | 1.08 | <0.001      | Firmicutes      | Negativicutes       | Selenomonadales    | Acidaminococcaceae  | Acidaminococcus   | intestini   | 0.98                   |
| -6.91 | 0.78 | <0.001      | Verrucomicrobia | Verrucomicrobiae    | Verrucomicrobiales | Verrucomicrobiaceae | Akkermansia       | NA          | 0.31                   |
