# Supplementary material
Source: PubMed Central journal article supplement (PMC8211907)

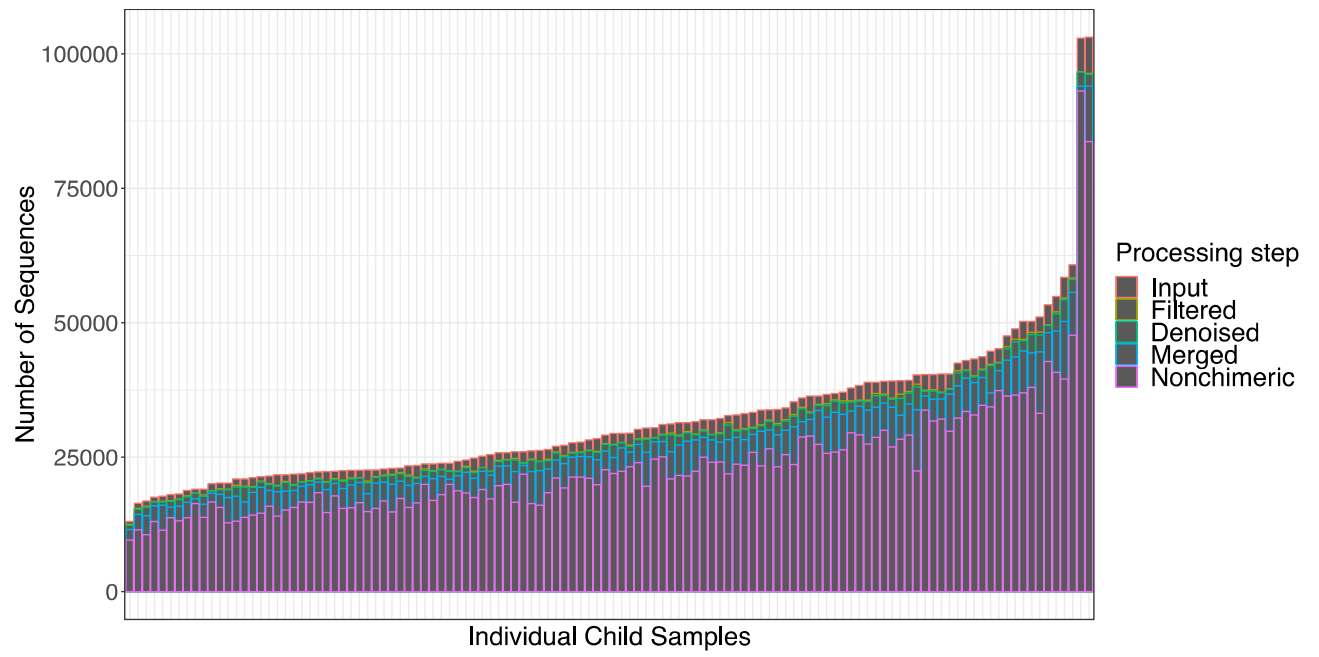

**Figure S3.** The total number of sequences maintained in each preprocessing step for each sample.

Supplement: NIHMS1656160-supplement-Fig_S3.pdf [file NIHMS1656160-supplement-Fig_S3.pdf]
